# Supplementary material for: An Explainable EEG-Based Human Activity Recognition Model Using Machine-Learning Approach and LIME
Source: MDPI journal article supplement (doi:10.3390/s23177452), 2023-08-27
Supplement: s1 [file s1]

## Supplementary Section

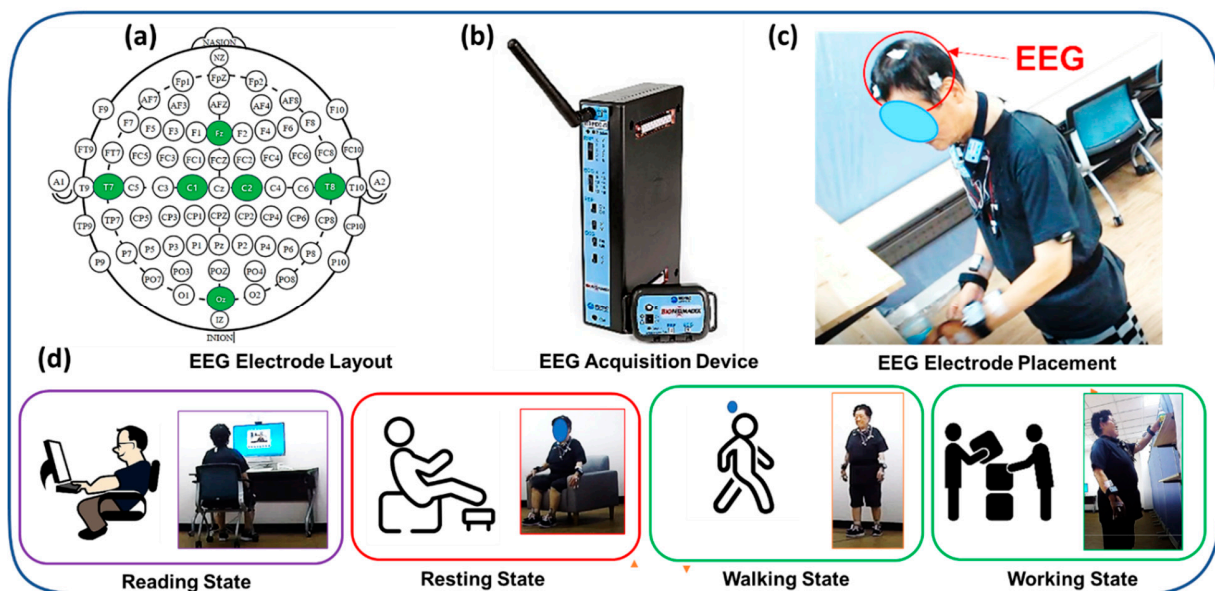

**Figure S1.** EEG Signal Processing and electrode positions and layout. (a) six-channel EEG, reference and ground electrodes position based on Standard 10–20 EEG system, (b) Biopac EEG module, (C) Experimental scenario, (c) Activity Classes with scenarios.

**Table S1.** List of the top 20 EEG features with higher k values using feature selection to train the machine learning Human Activity Recognition (HAR) models. RP: Relative Power; T: Temporal lobe; C: Central lobe; F: Frontal lobe; O: Occipital lobe; G: Global (Averaged over F, C, T, and O).

1. RP\_Theta\_T
2. RP\_Theta\_G
3. RP\_Gamma\_C
4. RP\_Beta\_F
5. RP\_Beta\_G
6. RP\_Theta\_O
7. RP\_Theta\_C
8. RP\_Beta\_T
9. RP\_Gamma\_G
10. RP\_Theta\_F
11. RP\_Beta\_C
12. RP\_Alpha\_F
13. pdBSI\_alpha\_C
14. RP\_Gamma\_T
15. RP\_Gamma\_O
16. pdBSI\_C
17. pdBSI\_gamma\_C
18. pdBSI\_beta\_C
19. RP\_Beta\_O
20. RP\_Alpha\_G
